# Supplementary figures and images for: Global reorganisation of cis-regulatory units upon lineage commitment of human embryonic stem cells
Source: eLife journal article supplement (doi:10.7554/elife.21926), 2017-03-23

A

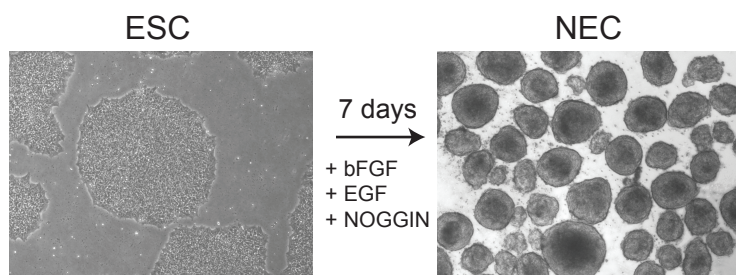

B

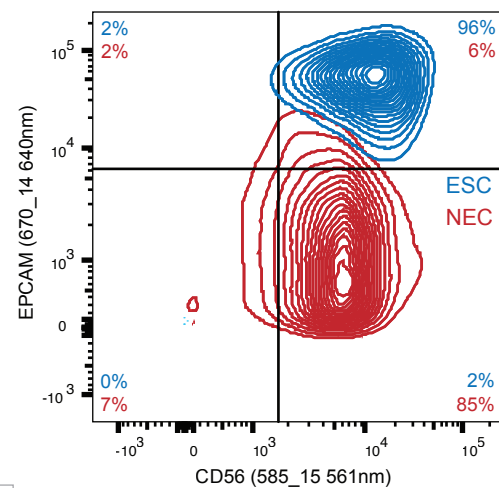

C

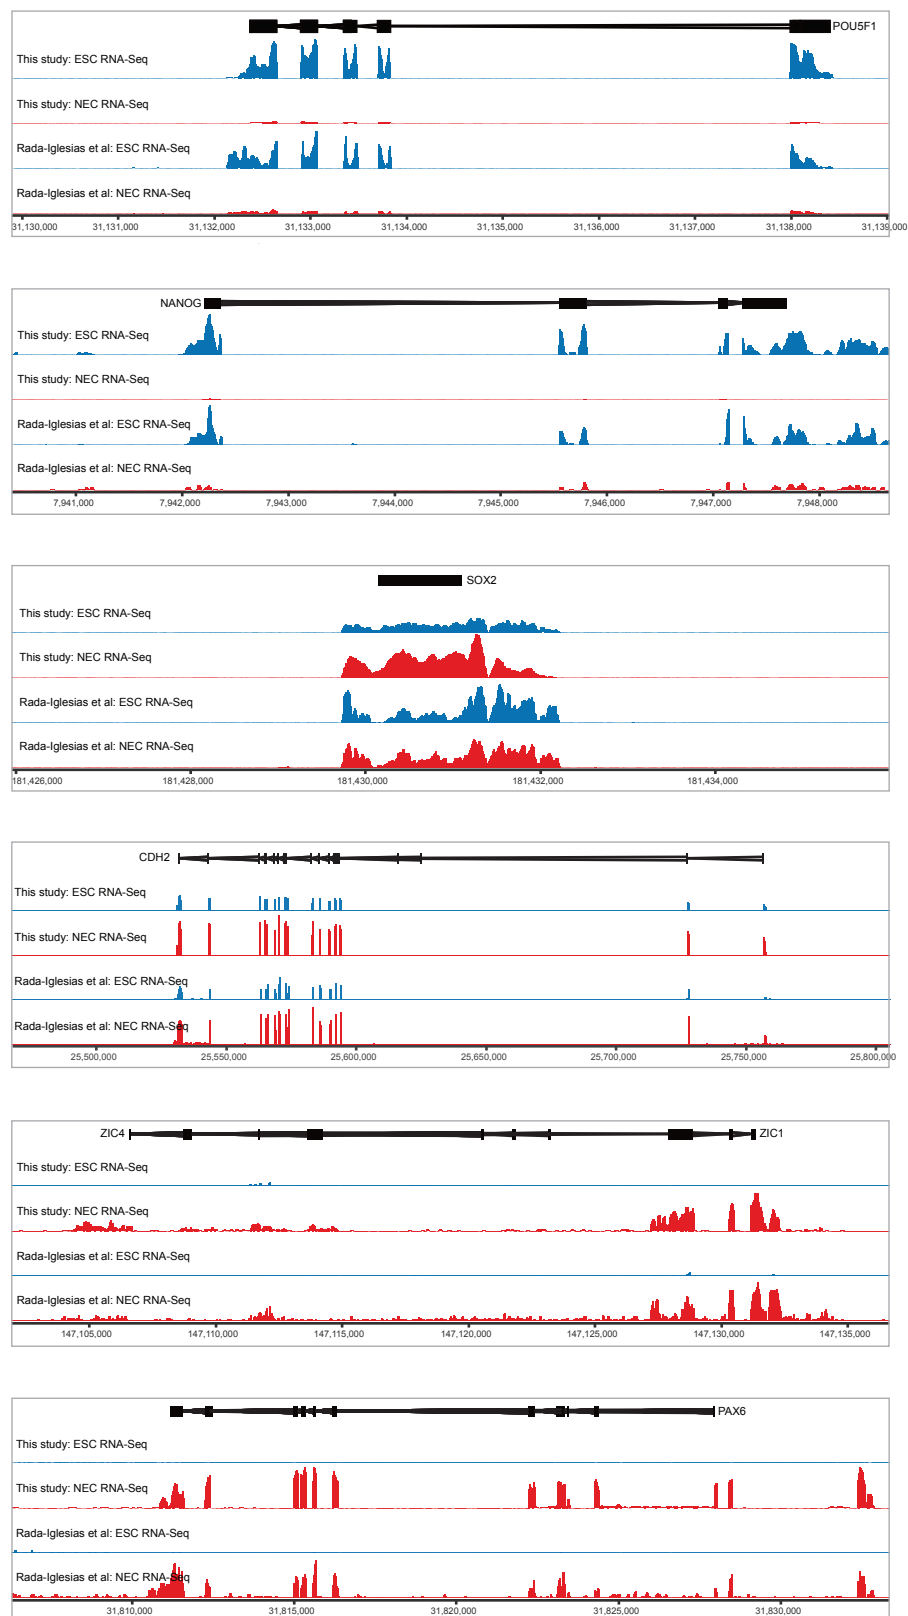

Supplement: supp [file elife_poa_e21926_Figure_1_figure_supplement_1.pdf › elife_poa_e21926_Figure_1_figure_supplement_1.pdf]

A

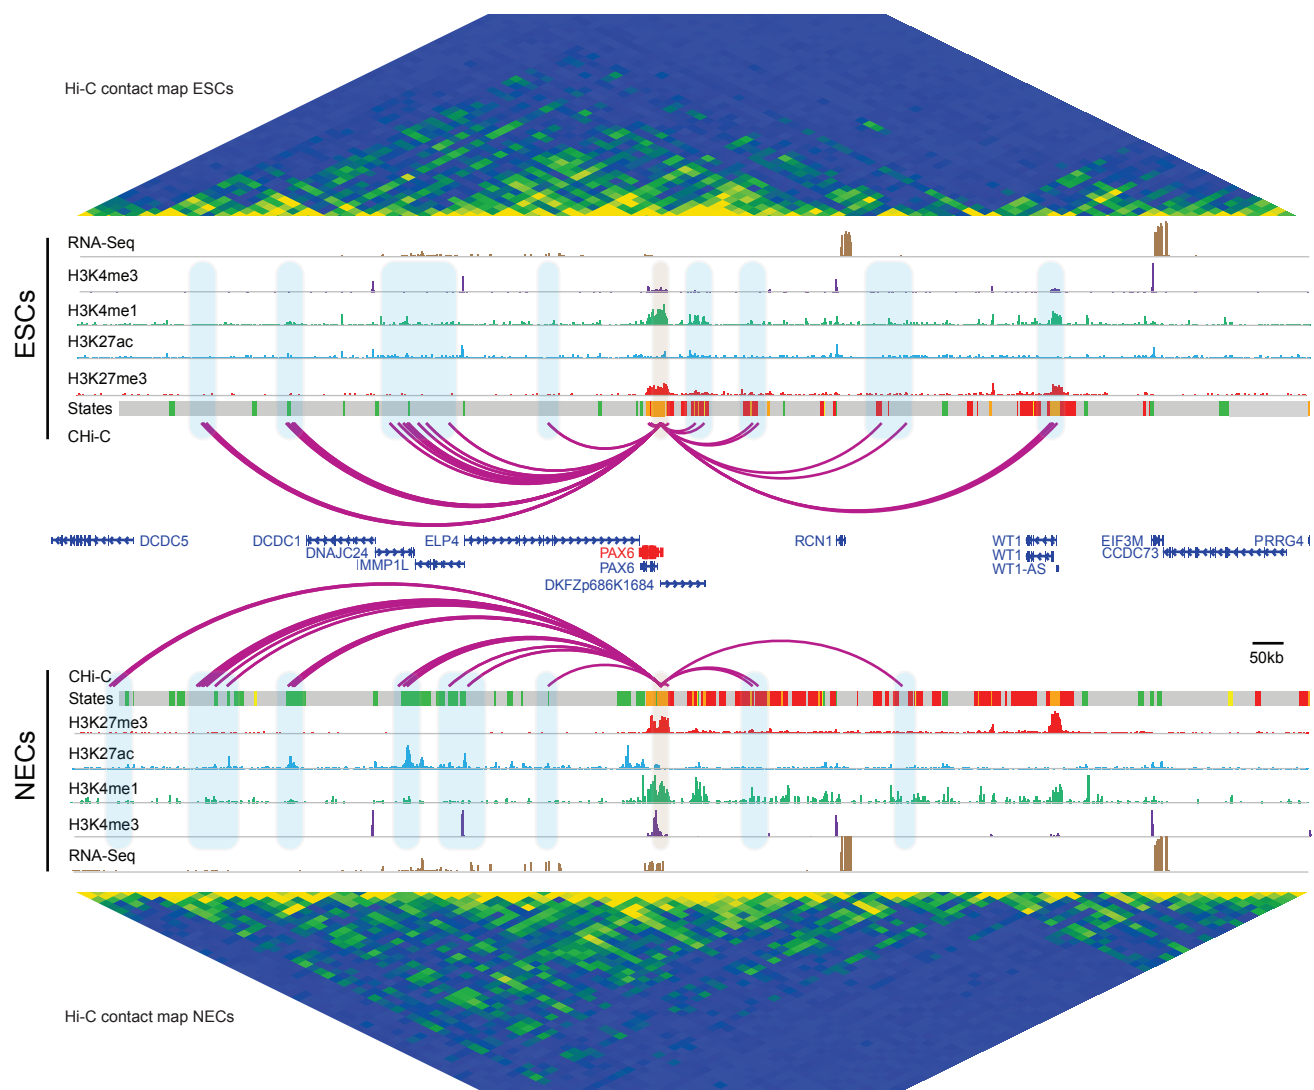

B

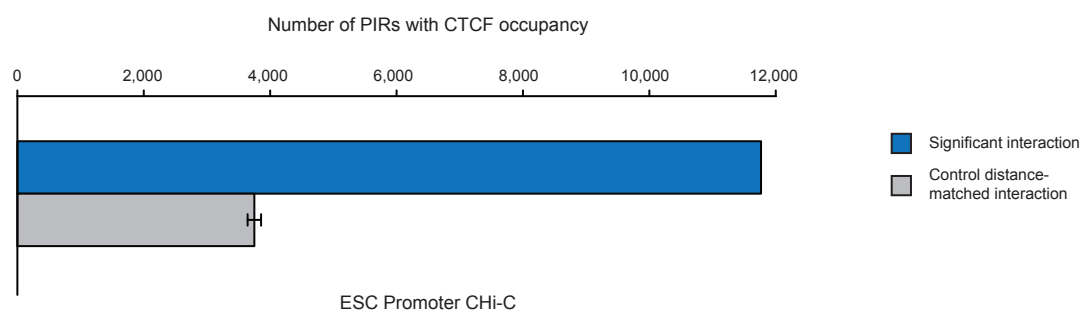

Supplement: supp [file elife_poa_e21926_Figure_1_figure_supplement_2.pdf › elife_poa_e21926_Figure_1_figure_supplement_2.pdf]

## A Chromatin states for ESCs and NECs

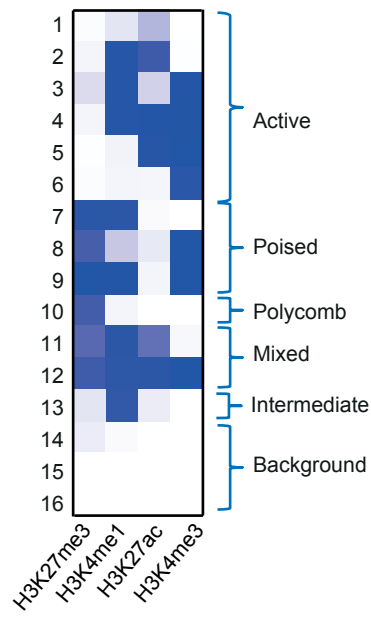

## B

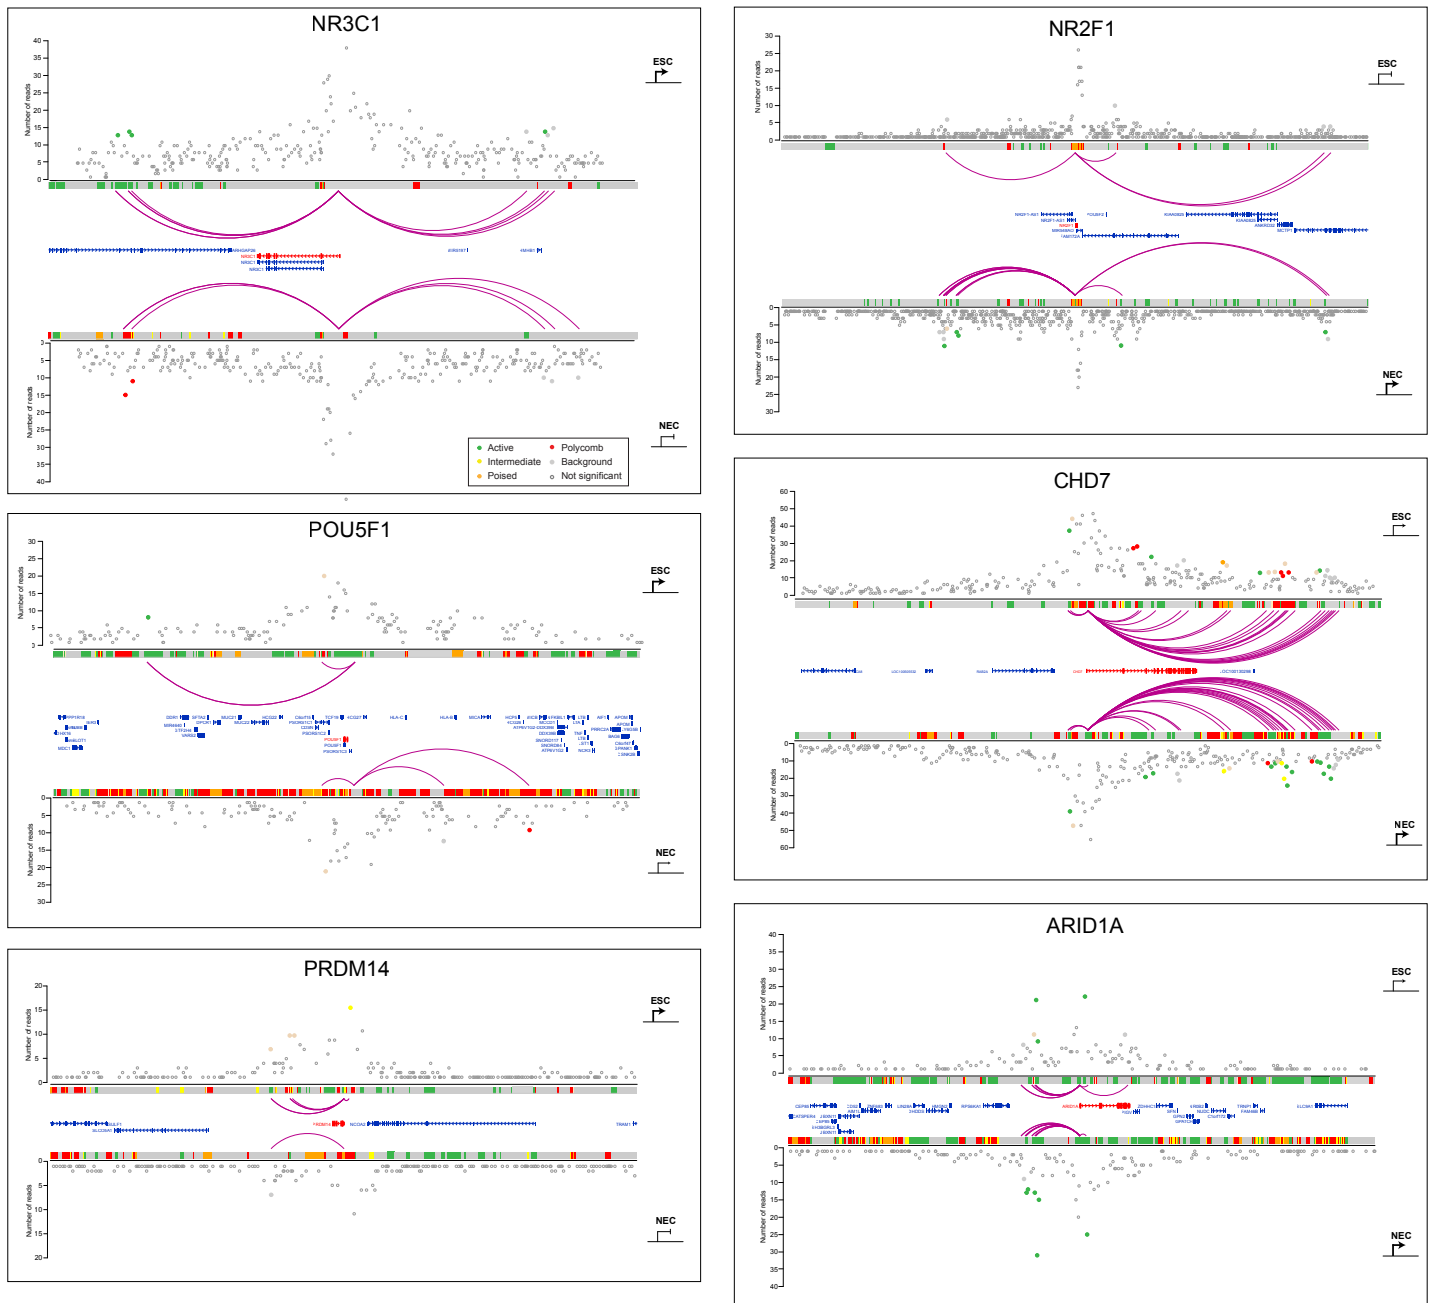

Supplement: supp [file elife_poa_e21926_Figure_1_figure_supplement_3.pdf › elife_poa_e21926_Figure_1_figure_supplement_3.pdf]

A

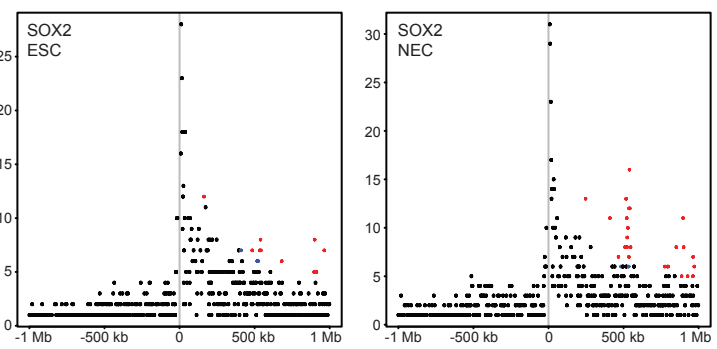

B

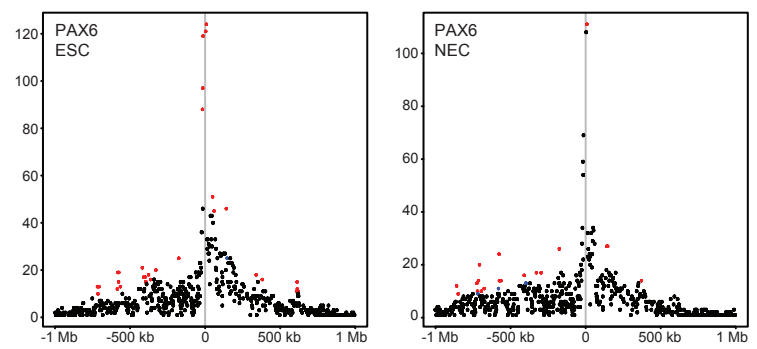

C

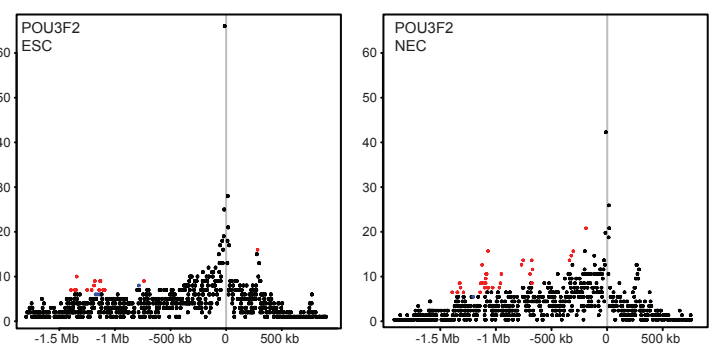

D

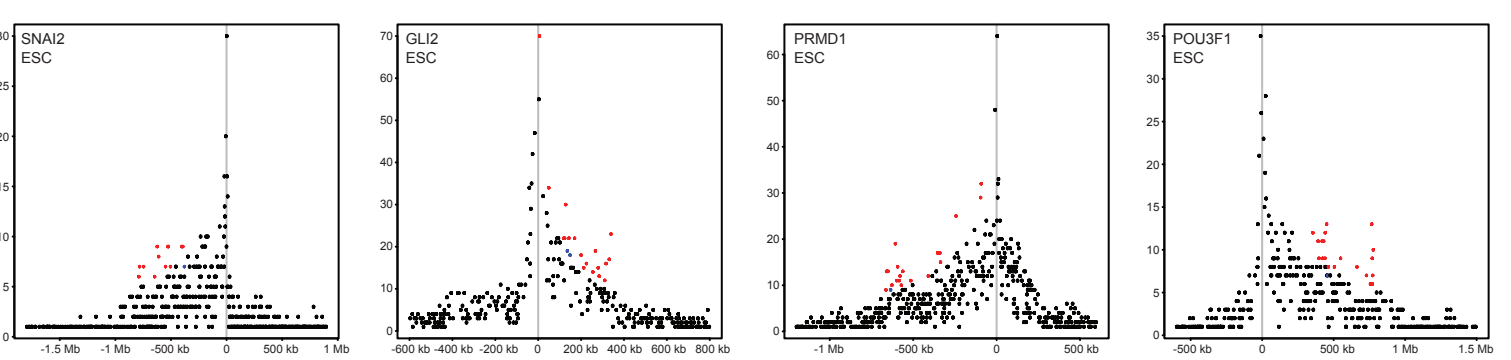

Supplement: supp [file elife_poa_e21926_Figure_1_figure_supplement_4.pdf › elife_poa_e21926_Figure_1_figure_supplement_4.pdf]

A

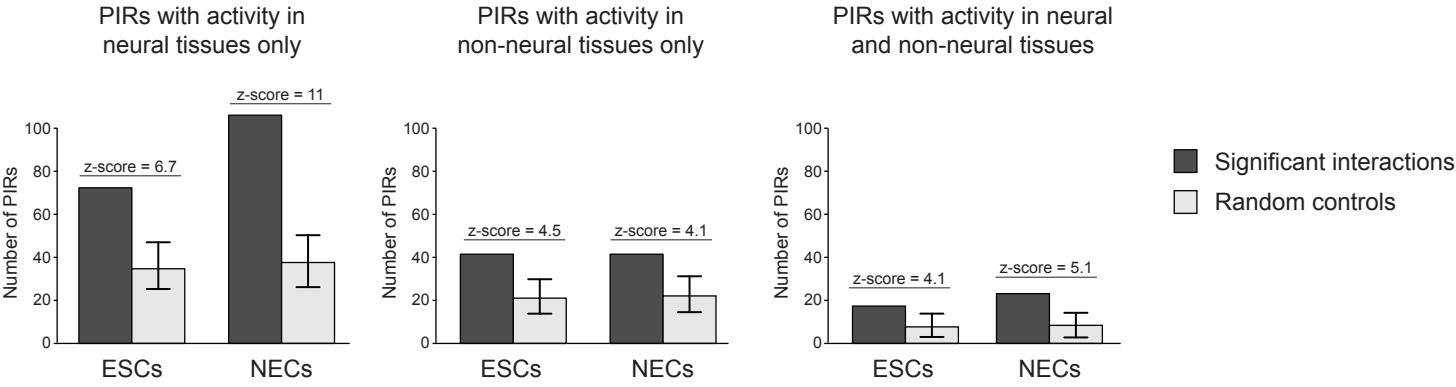

B

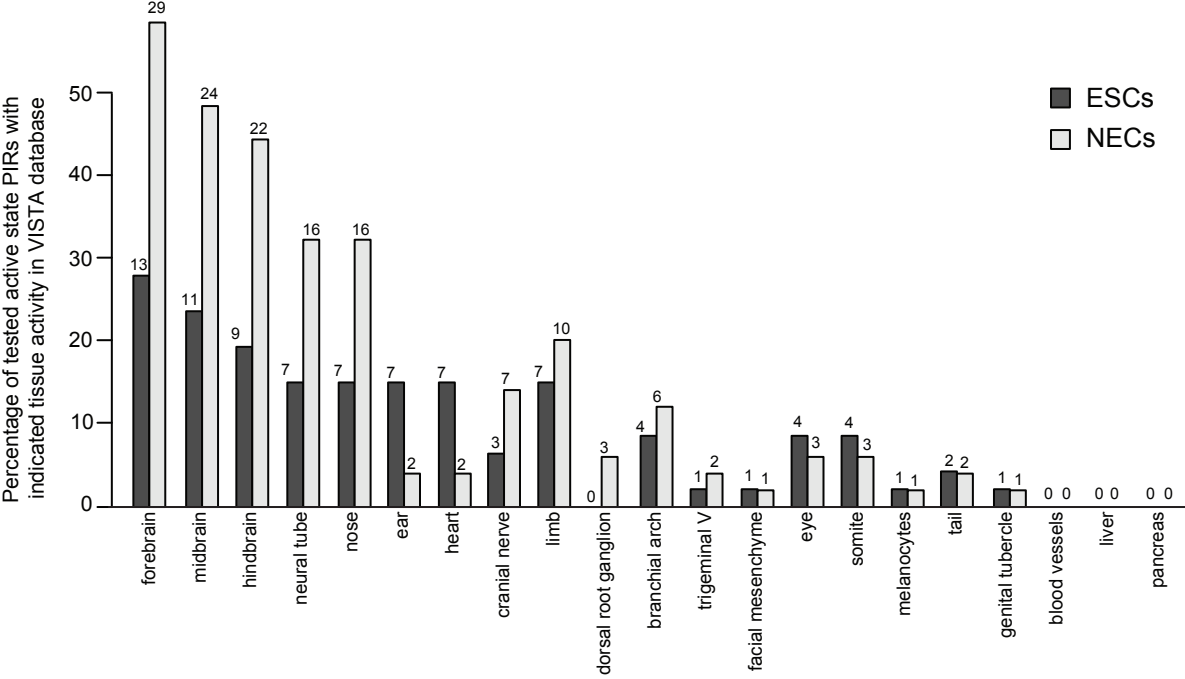

Supplement: supp [file elife_poa_e21926_Figure_2_figure_supplement_1.pdf › elife_poa_e21926_Figure_2_figure_supplement_1.pdf]

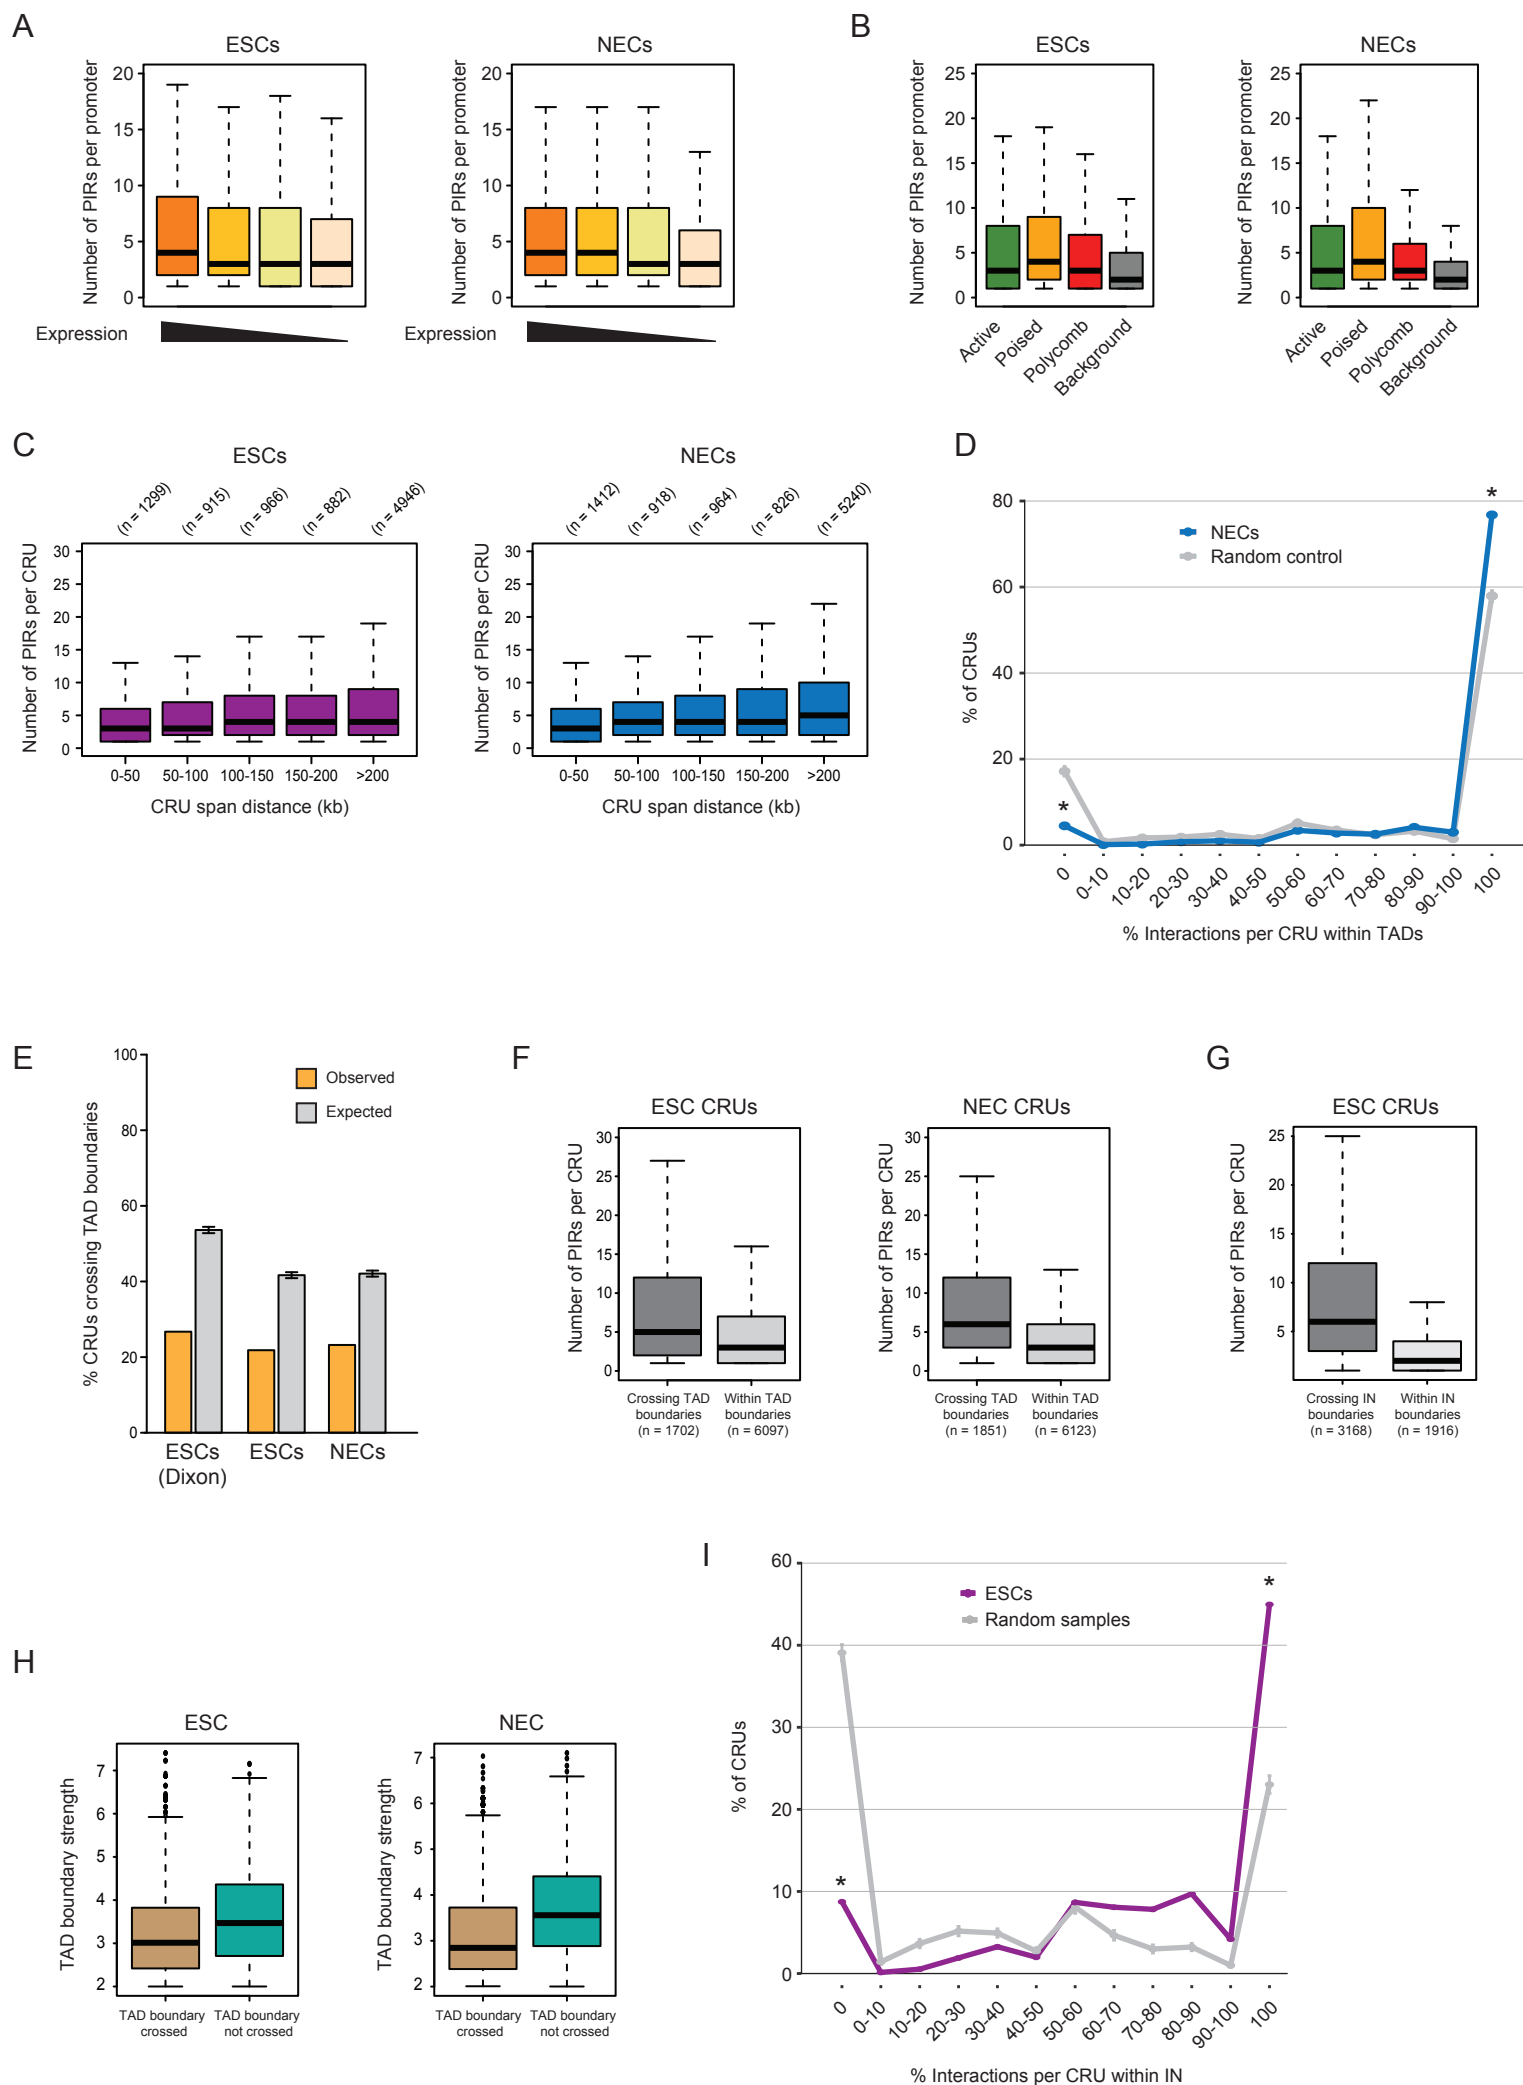

Supplement: supp [file elife_poa_e21926_Figure_3_figure_supplement_1.pdf › elife_poa_e21926_Figure_3_figure_supplement_1.pdf]

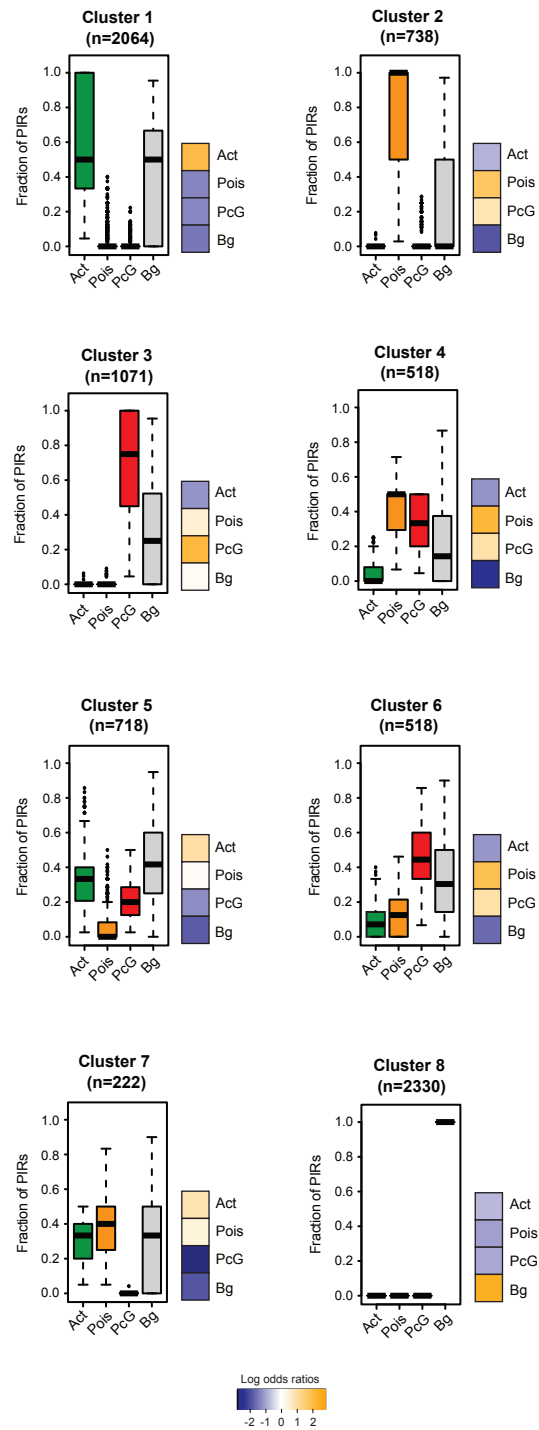

Supplement: supp [file elife_poa_e21926_Figure_4_figure_supplement_1.pdf › elife_poa_e21926_Figure_4_figure_supplement_1.pdf]

### CARS CRU (Cluster 1)

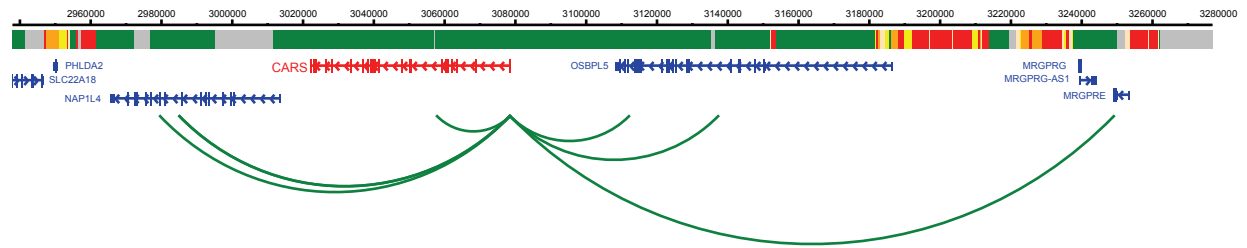

### PAX9 CRU (Cluster 2)

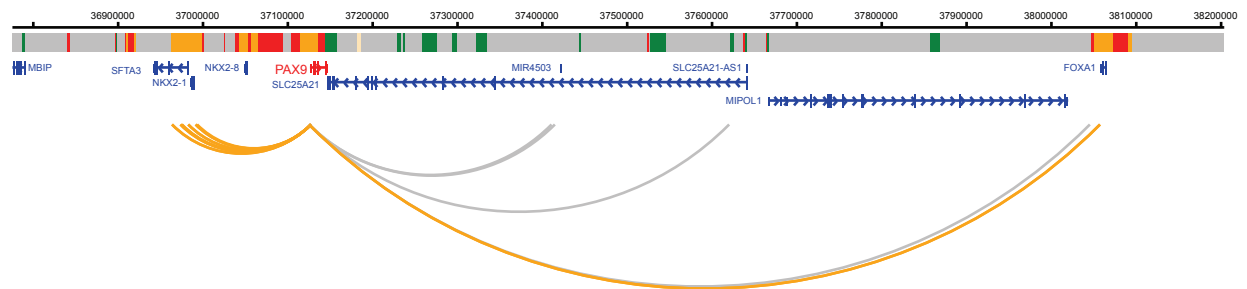

### CNPY1 CRU (Cluster 2)

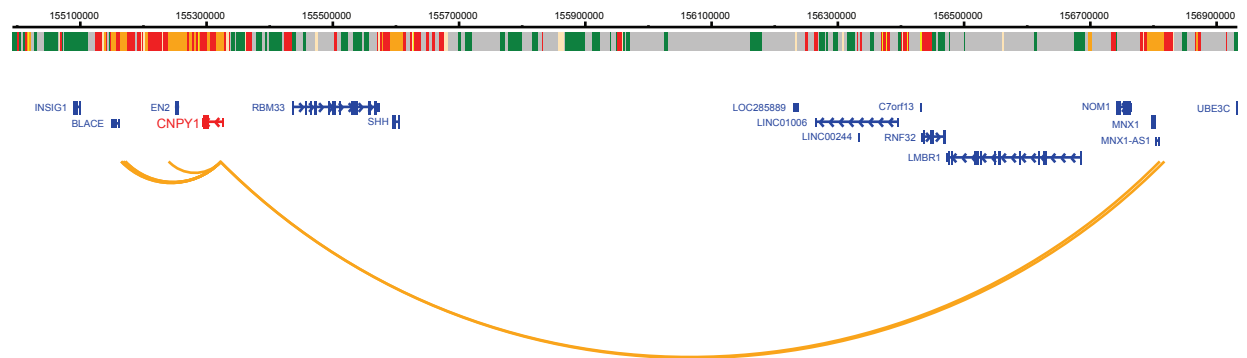

### RXRG CRU (Cluster 3)

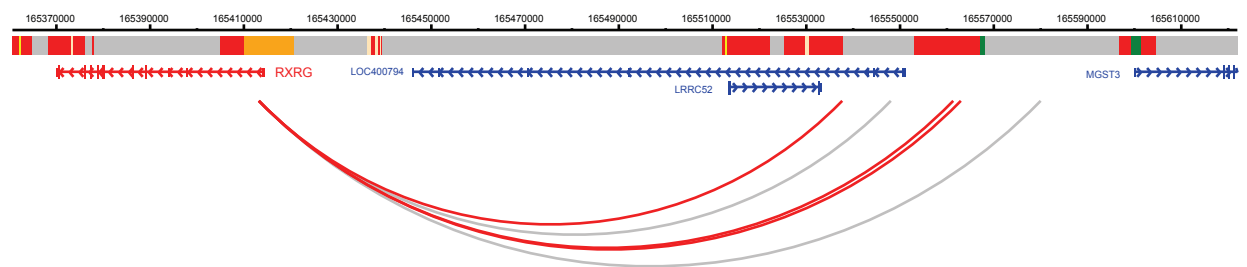

### AGAP2 CRU (Cluster 7)

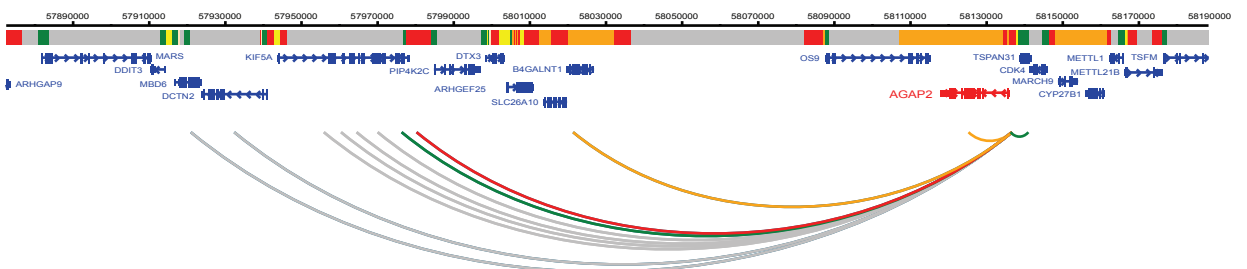

Supplement: supp [file elife_poa_e21926_Figure_4_figure_supplement_2.pdf › elife_poa_e21926_Figure_4_figure_supplement_2.pdf]

A

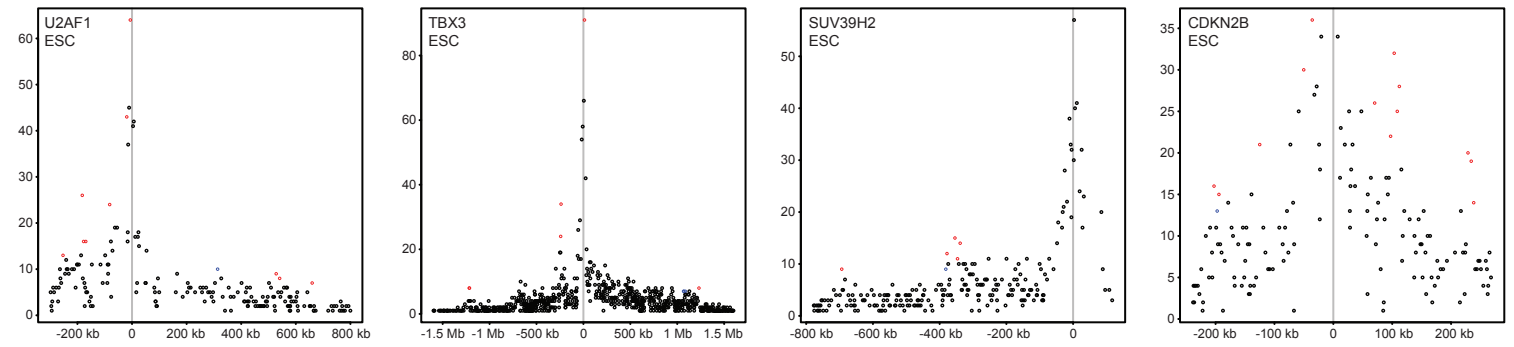

B

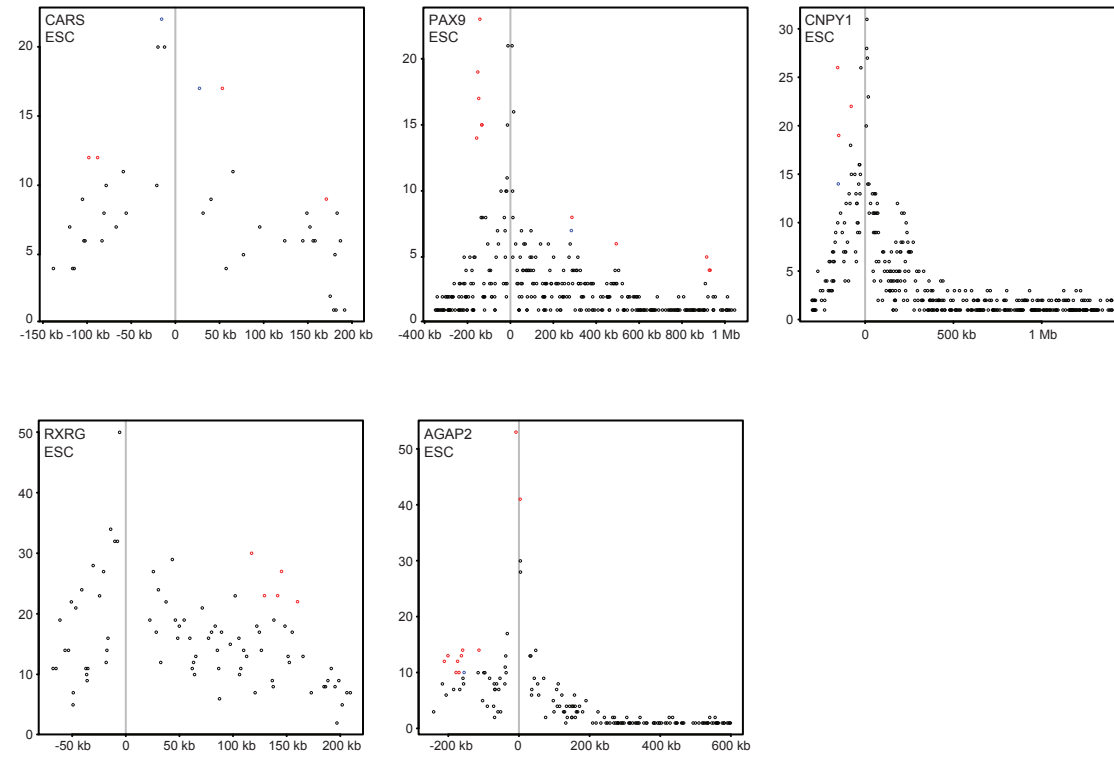

C

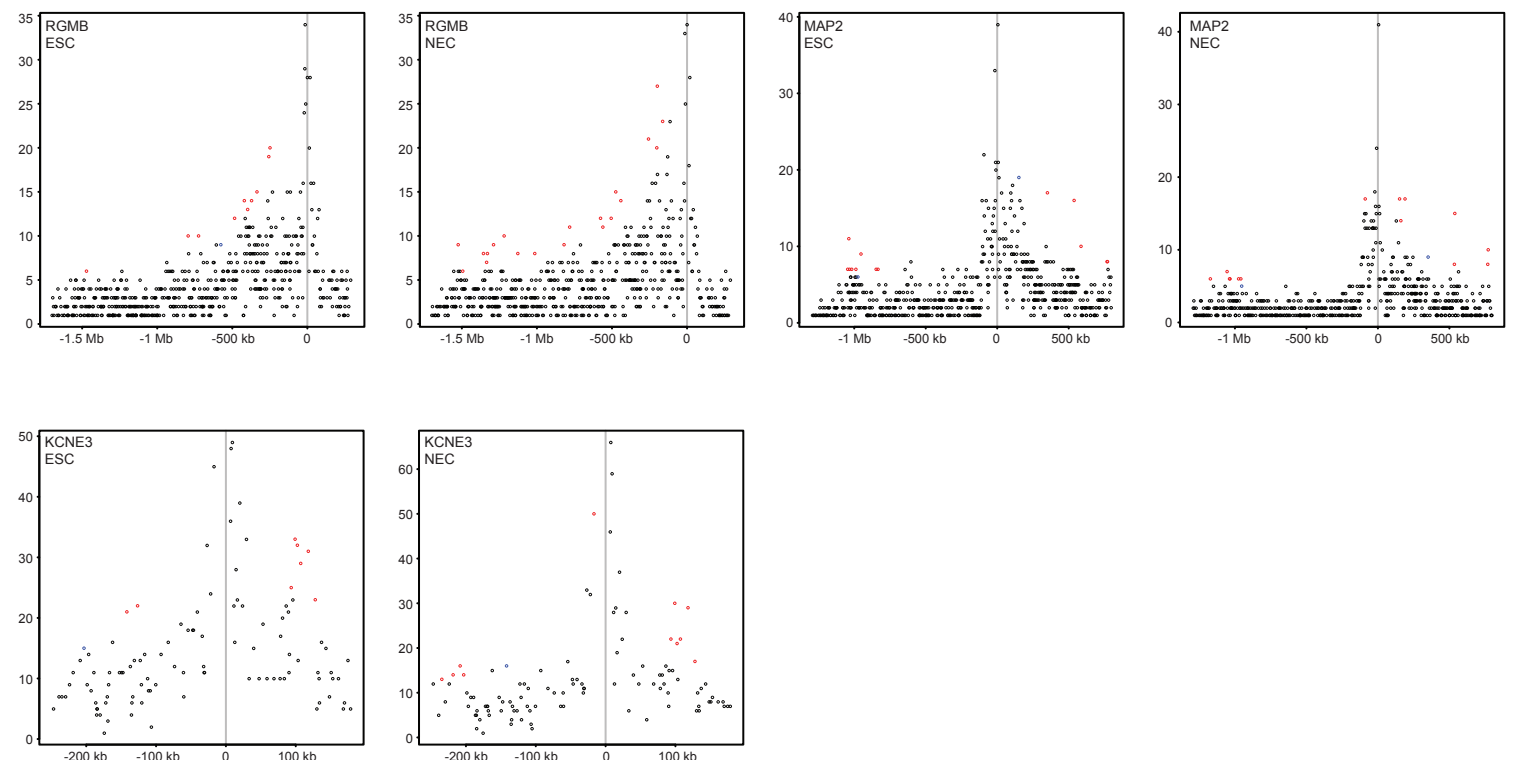

Supplement: supp [file elife_poa_e21926_Figure_4_figure_supplement_3.pdf › elife_poa_e21926_Figure_4_figure_supplement_3.pdf]

A

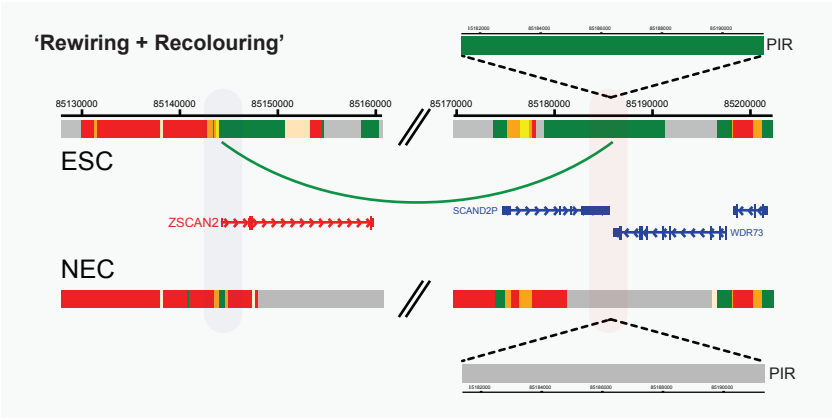

B

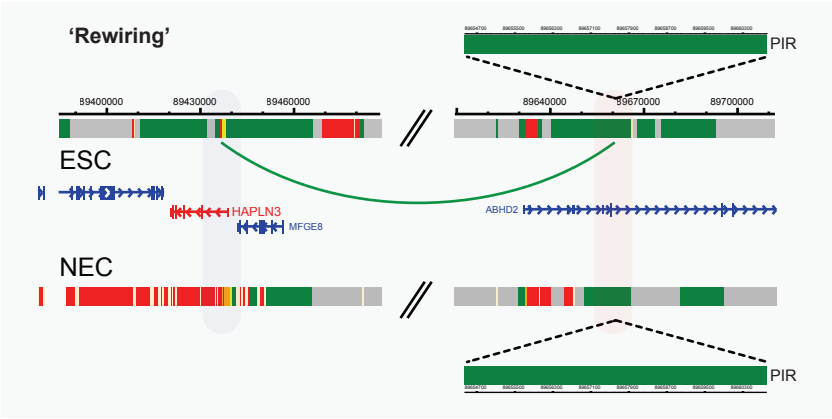

C

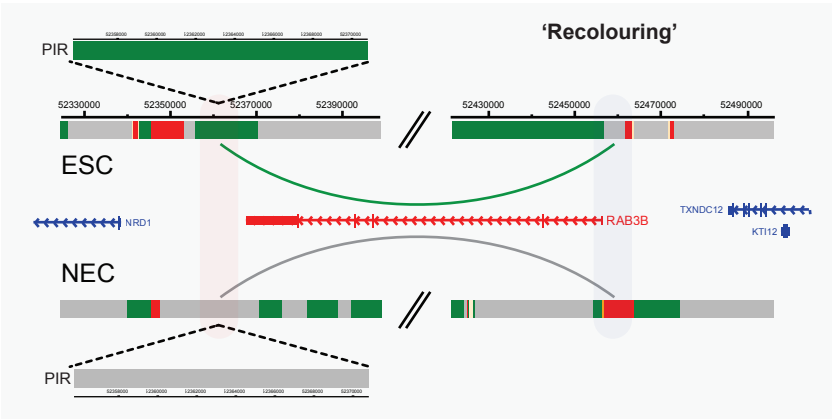

Supplement: supp [file elife_poa_e21926_Figure_6_figure_supplement_1.pdf › elife_poa_e21926_Figure_6_figure_supplement_1.pdf]
